# Supplementary material
Source: Research Square preprint supplement (doi:10.21203/rs.3.rs-13753/v2)

Supplementary material: Algorithm

1. National TB Programme’s algorithm available in 2016


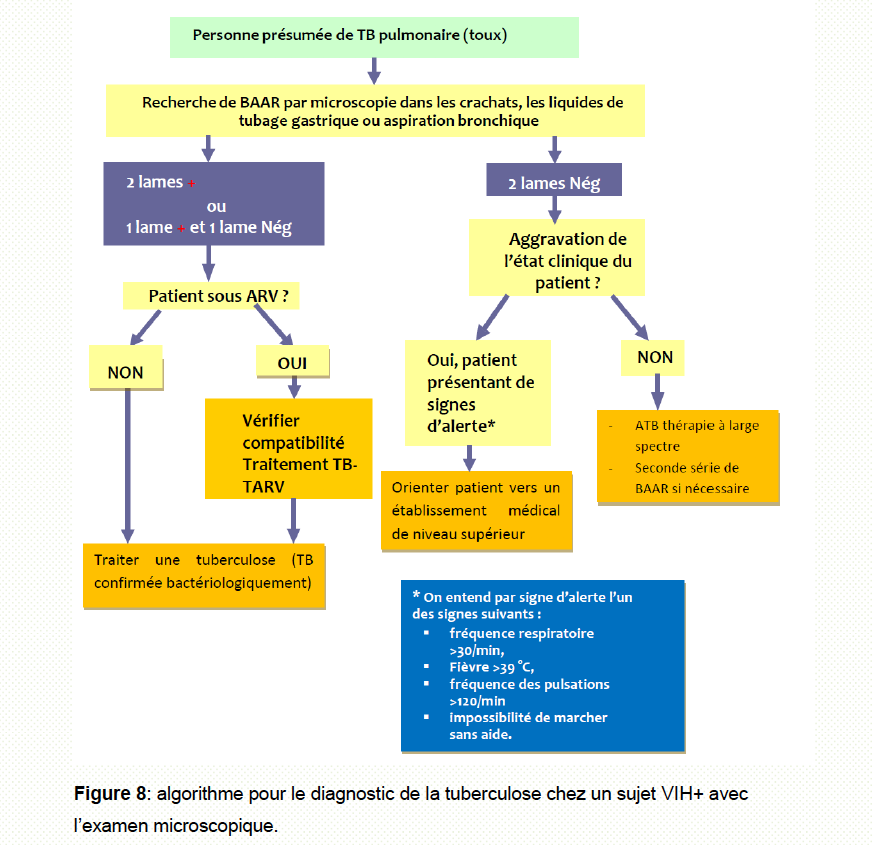


1. National TB Programme’s algorithms developed and implemented in 2017


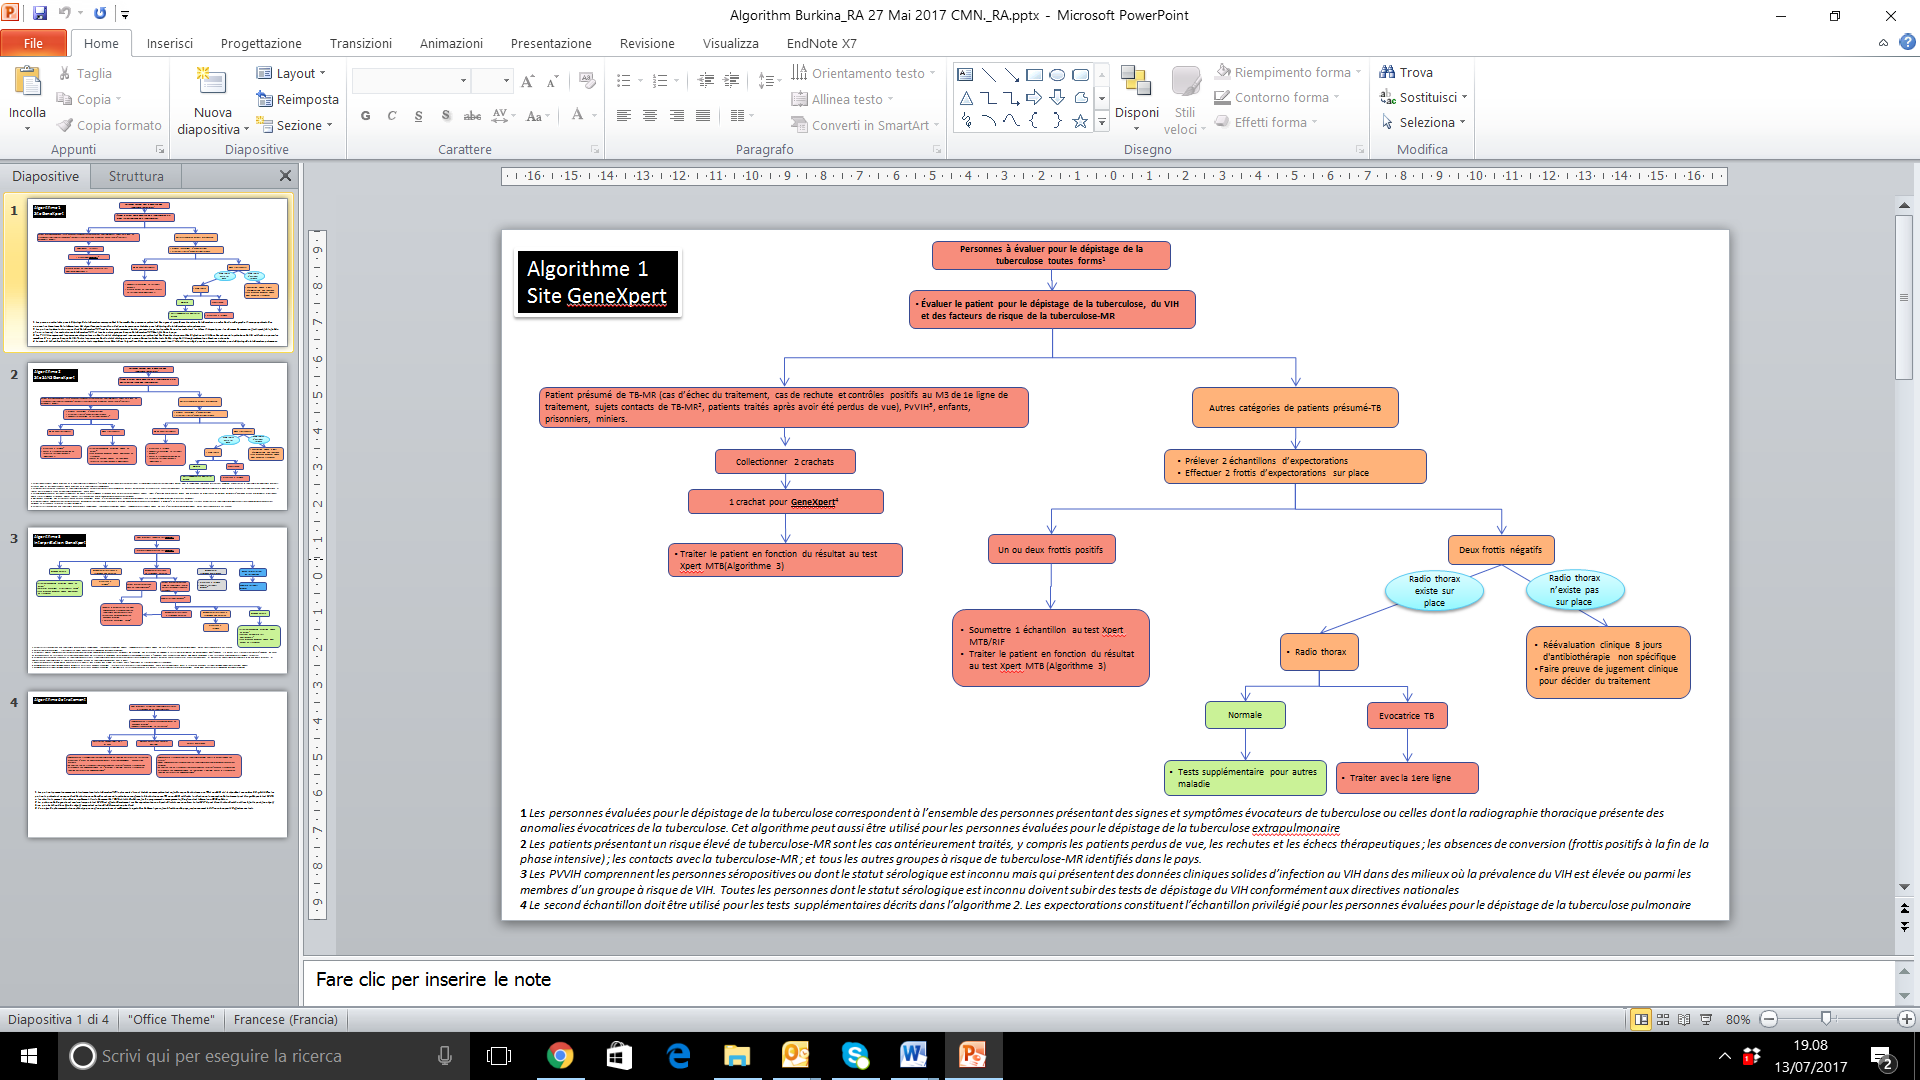


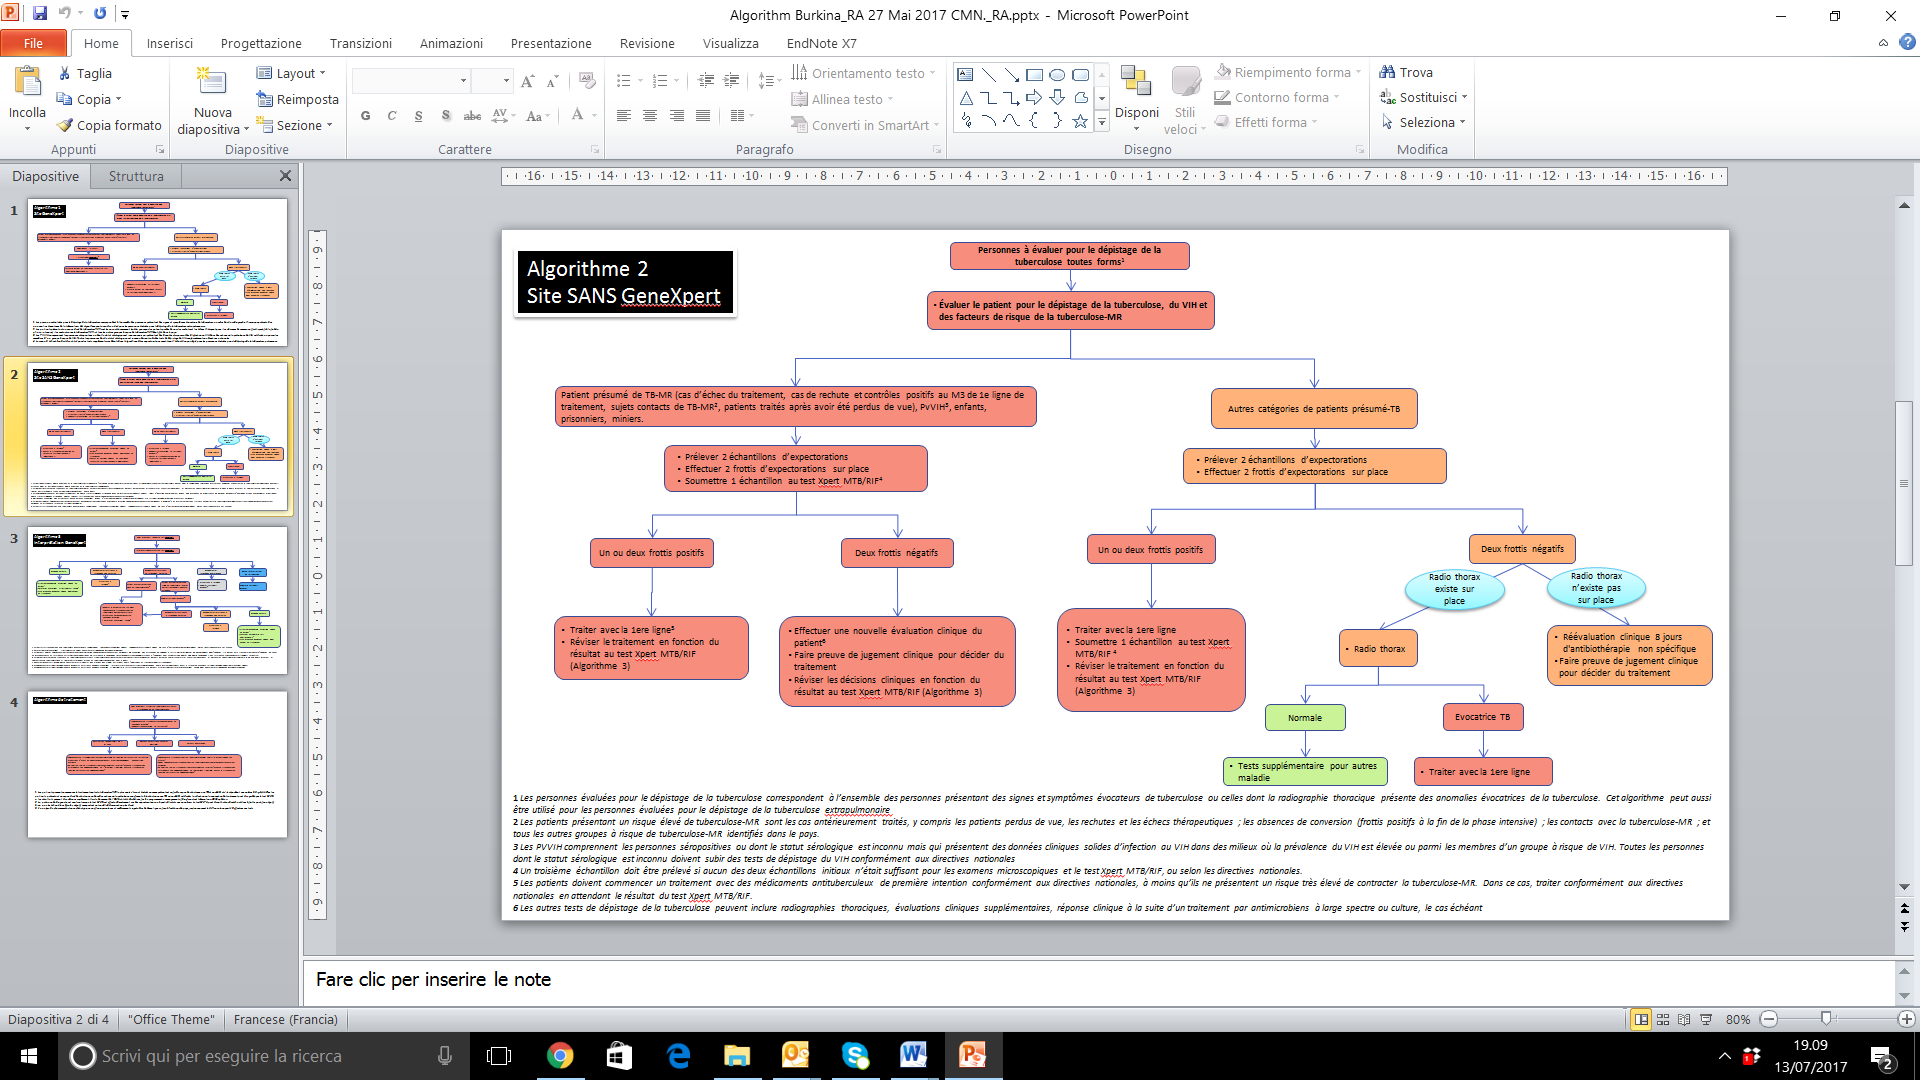


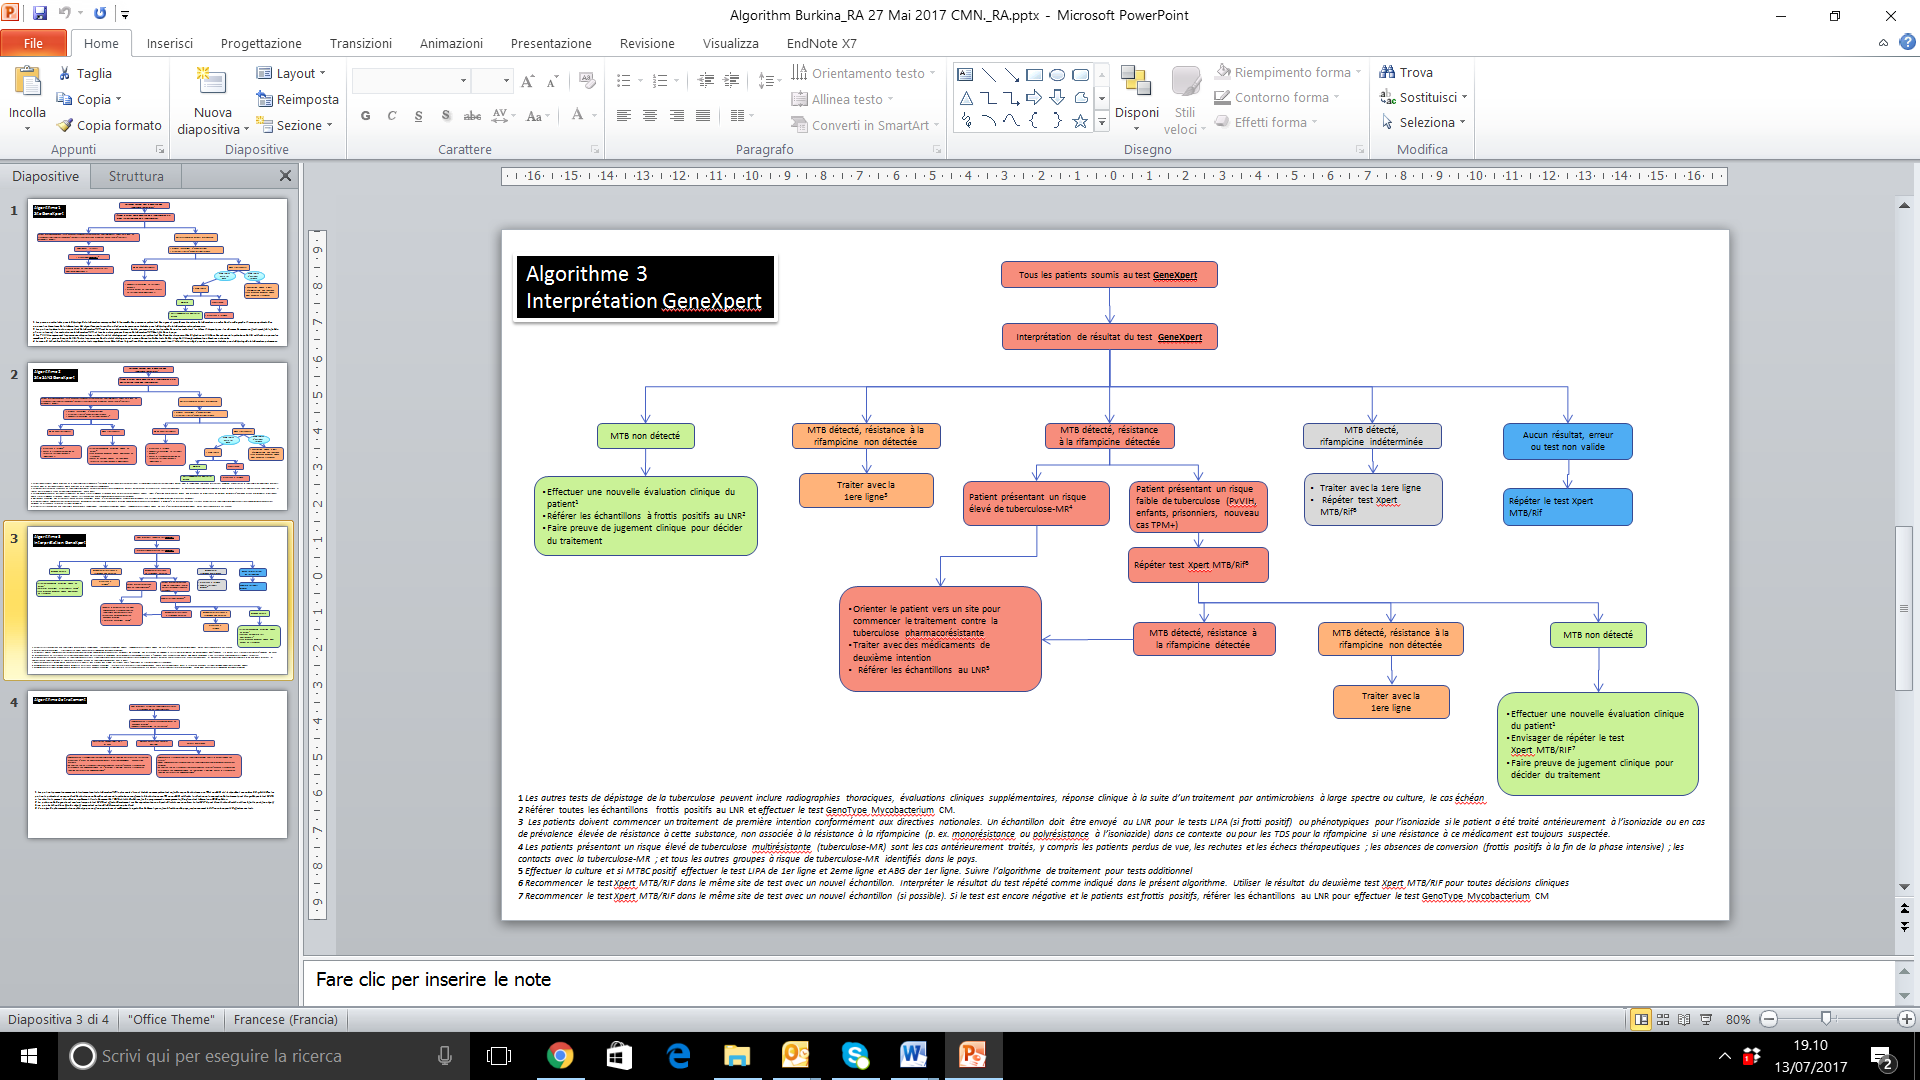


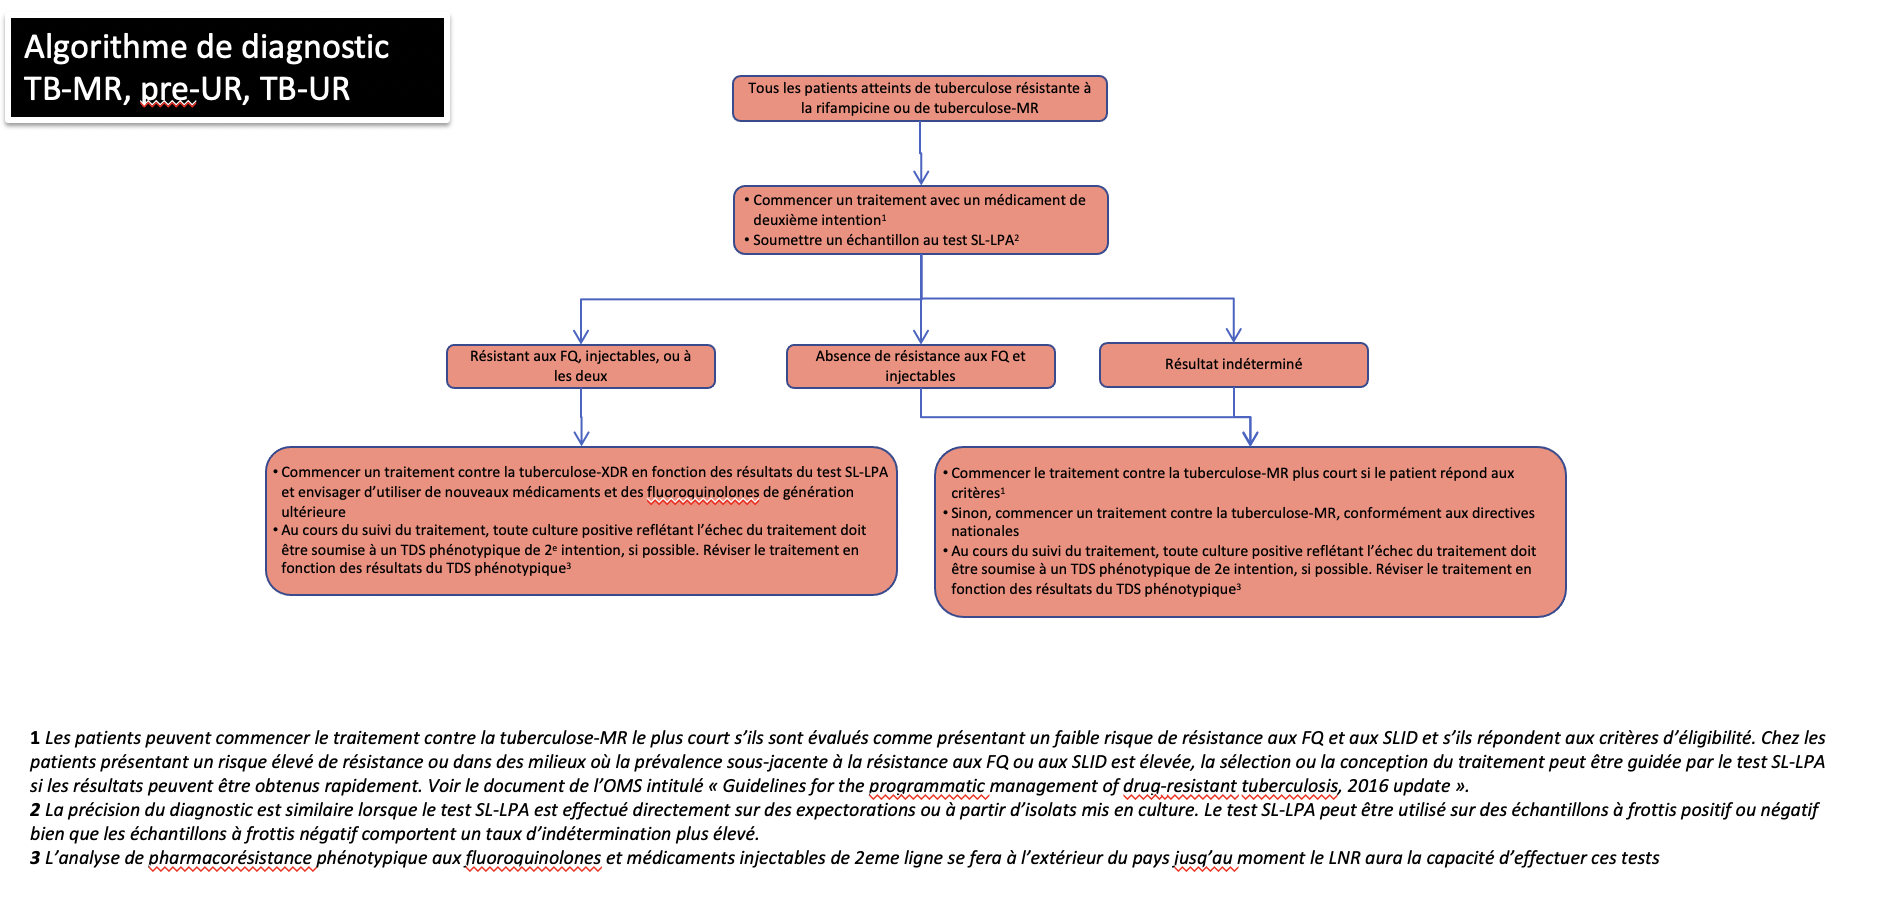

Supplement: Supplementary file 1 [file 8fe57f2e8f851e010d1f7343.docx]
